# Supplementary material
Source: HighWire-hosted journal article supplement (http://d2538ggaoe6cji.cloudfront.net/highwire/filestream/43724/field_highwire_adjunct_files/0/147678-1.pdf)
Supplement: 147678-1.pdf [file 147678-1.pdf]

## Supplementary Material.

Alexander P Browning · Scott W McCue ·

Matthew J Simpson

the date of receipt and acceptance should be inserted later

## 1 Posterior distributions

In the main document we present a series of ABC posterior distributions that are constructed using the top 10,000 samples from a total of 1,000,000 prior samples, giving  $u = 0.01$ . In this supplementary material document we present equivalent posterior distributions that are constructed using the top 20,000 of the same 1,000,000 samples, giving  $u = 0.02$ . Results in Fig S1-S2 correspond to the results in Fig 3-5 in the main document. Both a qualitative and quantitative comparison of these two sets of results shows that the results are insensitive to our choice of setting  $u = 0.01$ .

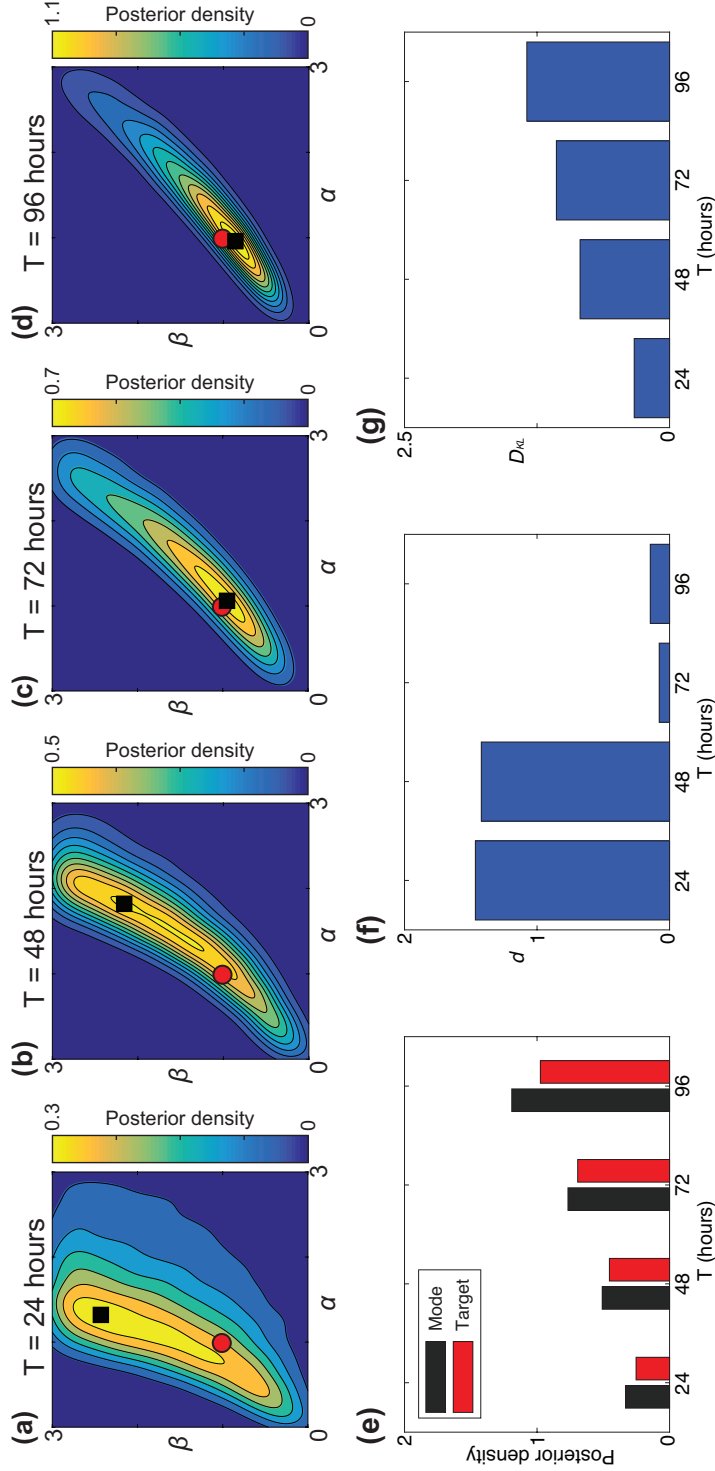

**Fig. S1. Posterior distributions for Case 1:  $(\alpha, \beta) = (1, 1)$ .** (a)-(d) ABC posterior distributions for: (a)  $T = 24$  hours; (b)  $T = 48$  hours; (c)  $T = 72$  hours and (d)  $T = 96$  hours. The posterior distribution is approximated using the best 20,000 samples from 1,000,000 prior samples ( $u = 0.02$ ), as measured by  $\rho$ . The red circles shows the location of the observed data ( $\alpha = 1, \beta = 1$ ). The black squares indicate the mode of the posterior density. The modes are (1.32, 2.43), (1.82, 2.16), (1.06, 0.95) and (0.96, 0.86) in (a)-(d), respectively. (e)-(g) Show measures of accuracy and precision. (e) Quantitatively compares the posterior density at the mode and the target parameter values. (f) Shows  $d$ , the Euclidean distance between the mode and target parameter values. (g) Shows  $D_{KL}$ , the Kullback-Leibler divergence from the prior, for each posterior distribution.

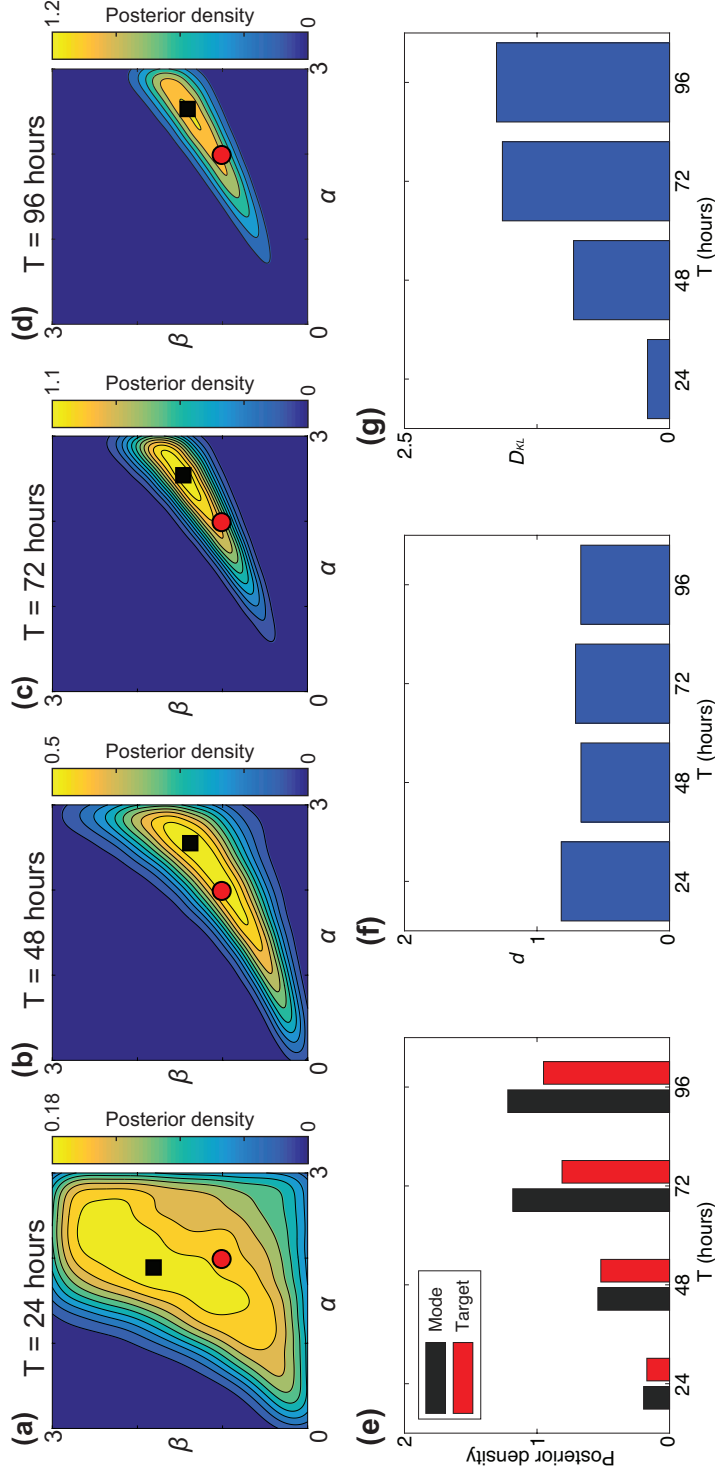

**Fig. S2. Posterior distributions for Case 1:  $(\alpha, \beta) = (2, 1)$ .** (a)-(d) ABC posterior distributions for: (a)  $T = 24$  hours; (b)  $T = 48$  hours; (c)  $T = 72$  hours and (d)  $T = 96$  hours. The posterior distribution is approximated using the best 20,000 samples from 1,000,000 prior samples ( $u = 0.02$ ), as measured by  $\rho$ . The red circles show the location of the observed data ( $\alpha = 2, \beta = 1$ ). The black squares indicate the mode of the posterior density. The modes are (1.89, 1.81), (2.55, 1.38), (2.54, 1.46) and (2.53, 1.41) in (a)-(d), respectively. (e)-(g) Show measures of accuracy and precision. (e) Quantitatively compares the posterior density at the mode and the target parameter values. (f) Shows  $d$ , the Euclidean distance between the mode and target parameter values. (g) Shows  $D_{KL}$ , the Kullback-Leibler divergence from the prior, for each posterior distribution.

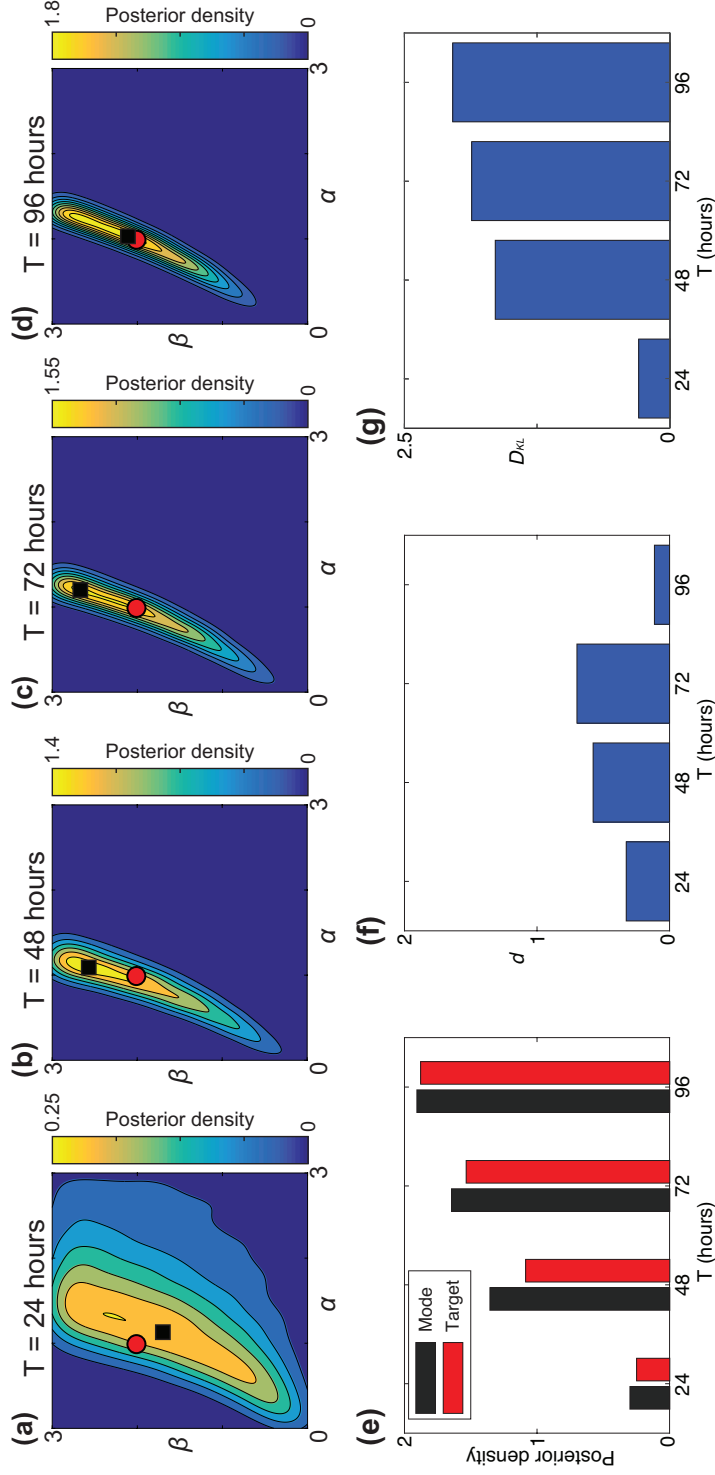

**Fig. S3. Posterior distributions for Case 1:  $(\alpha, \beta) = (1, 2)$ .** (a)-(d) ABC posterior distributions for: (a)  $T = 24$  hours; (b)  $T = 48$  hours; (c)  $T = 72$  hours and (d)  $T = 96$  hours. The posterior distribution is approximated using the best 20,000 samples from 1,000,000 prior samples ( $u = 0.02$ ), as measured by  $\rho$ . The red circles show the location of the target parameters used to generate the observed data ( $\alpha = 1, \beta = 2$ ). The black squares indicate the mode of the posterior density. The modes are (1.13, 1.70), (1.09, 2.57), (1.20, 2.67) and (1.03, 2.11) in (a)-(d), respectively. (e)-(g) Show measures of accuracy and precision. (e) Quantitatively compares the posterior density at the mode and the target parameter values. (f) Shows  $d$ , the Euclidean distance between the mode and target parameter values. (g) Shows  $D_{KL}$ , the Kullback-Leibler divergence from the prior, for each posterior distribution.
